# Supplementary material
Source: HighWire-hosted journal article supplement (http://www.qdcxjkg.com/highwire/filestream/113594/field_highwire_adjunct_files/0/ERJ-01082-2012_Disclosure.pdf)
Supplement: ERJ-01082-2012_Disclosure.pdf [file ERJ-01082-2012_Disclosure.pdf]

**F. Ratjen** has received an educational grant from Novartis Pharmaceutical Industries and consulting fees/honorarium from the following companies for acting as a consultant: Bayer, CSL Behring, Gilead, Inspire, Novartis, Roche, Talecris, Vertex. In addition he has received travel funding from Novartis Pharmaceutical and Pari.
